# Supplementary material for: Isolation of Novel Sesquiterpeniods and Anti-neuroinflammatory Metabolites from Nardostachys jatamansi
Source: PubMed Central journal article supplement (PMC6225174; doi:10.3390/molecules23092367), 2018-09-17
Supplement: molecules-23-02367-s001.pdf [file molecules-23-02367-s001.pdf]

## Supplementary Materials

### Isolation of Novel Sesquiterpenoids and Anti-neuroinflammatory Metabolites from *Nardostachys jatamansi*

Chi-Su Yoon <sup>1,2,#</sup>, Dong-Cheol Kim <sup>1,2,#</sup>, Jin-Soo Park <sup>1,#</sup>, Kwan-Woo Kim <sup>1</sup>, Youn-Chul Kim <sup>1</sup>, and Hyuncheol Oh<sup>1,2,\*</sup>

<sup>1</sup> College of Pharmacy, Wonkwang University, Iksan 54538, Republic of Korea; ycs1991@naver.com (C.-S.Y.); js9181515@naver.com (J.-S.P.); kimman07@hanmail.net (D.-C.K.); swamp1@naver.com (K.-W.K.); yckim@wku.ac.kr (Y.-C.K)

<sup>2</sup> Hanbang Cardio-Renal Syndrome Research Center, Wonkwang University, Iksan 54538, Republic of Korea

\* Correspondence: hoh@wku.ac.kr (H.O.); Tel.: +82-63-850-6815 (H.O.); Fax: +82-63-852-8837 (H.O.)

# These authors contributed equally to this work.

## List of Supporting Information

**Figure S1.** HRESIMS spectrum of compound **1**.

**Figure S2.**  $^1\text{H}$  NMR (400 MHz, acetone- $d_6$ ) spectrum of compound **1**.

**Figure S3.**  $^{13}\text{C}$  NMR (100 MHz, acetone- $d_6$ ) spectrum of compound **1**.

**Figure S4.**  $^1\text{H}$  NMR (400 MHz, pyridine- $d_5$ ) spectrum of compound **1**.

**Figure S5.**  $^{13}\text{C}$  NMR (100 MHz, pyridine- $d_5$ ) spectrum of compound **1**.

**Figure S6.** HRESIMS spectrum of compound **2**.

**Figure S7.**  $^1\text{H}$  NMR (400 MHz, pyridine- $d_5$ ) spectrum of compound **2**.

**Figure S8.**  $^{13}\text{C}$  NMR (100 MHz, pyridine- $d_5$ ) spectrum of compound **2**.

**Figure S9.** HRESIMS spectrum of compound **3**.

**Figure S10.**  $^1\text{H}$  NMR (400 MHz, chloroform- $d$ ) spectrum of compound **3**.

**Figure S11.**  $^{13}\text{C}$  NMR (100 MHz, chloroform- $d$ ) spectrum of compound **3**.

**Figure S12.** HRESIMS spectrum of compound **4**.

**Figure S13.**  $^1\text{H}$  NMR (400 MHz, chloroform- $d$ ) spectrum of compound **4**.

**Figure S14.**  $^{13}\text{C}$  NMR (100 MHz, chloroform- $d$ ) spectrum of compound **4**.

**Figure S15.** HRESIMS spectrum of compound **5**.

**Figure S16.**  $^1\text{H}$  NMR (400 MHz, DMSO- $d_6$ ) spectrum of compound **5**.

**Figure S17.**  $^{13}\text{C}$  NMR (100 MHz, DMSO- $d_6$ ) spectrum of compound **5**.

**Figure S18.**  $^1\text{H}$  NMR (400 MHz, pyridine- $d_5$ ) spectrum of compound **5**.

**Figure S19.**  $^{13}\text{C}$  NMR (100 MHz, pyridine- $d_5$ ) spectrum of compound **5**.

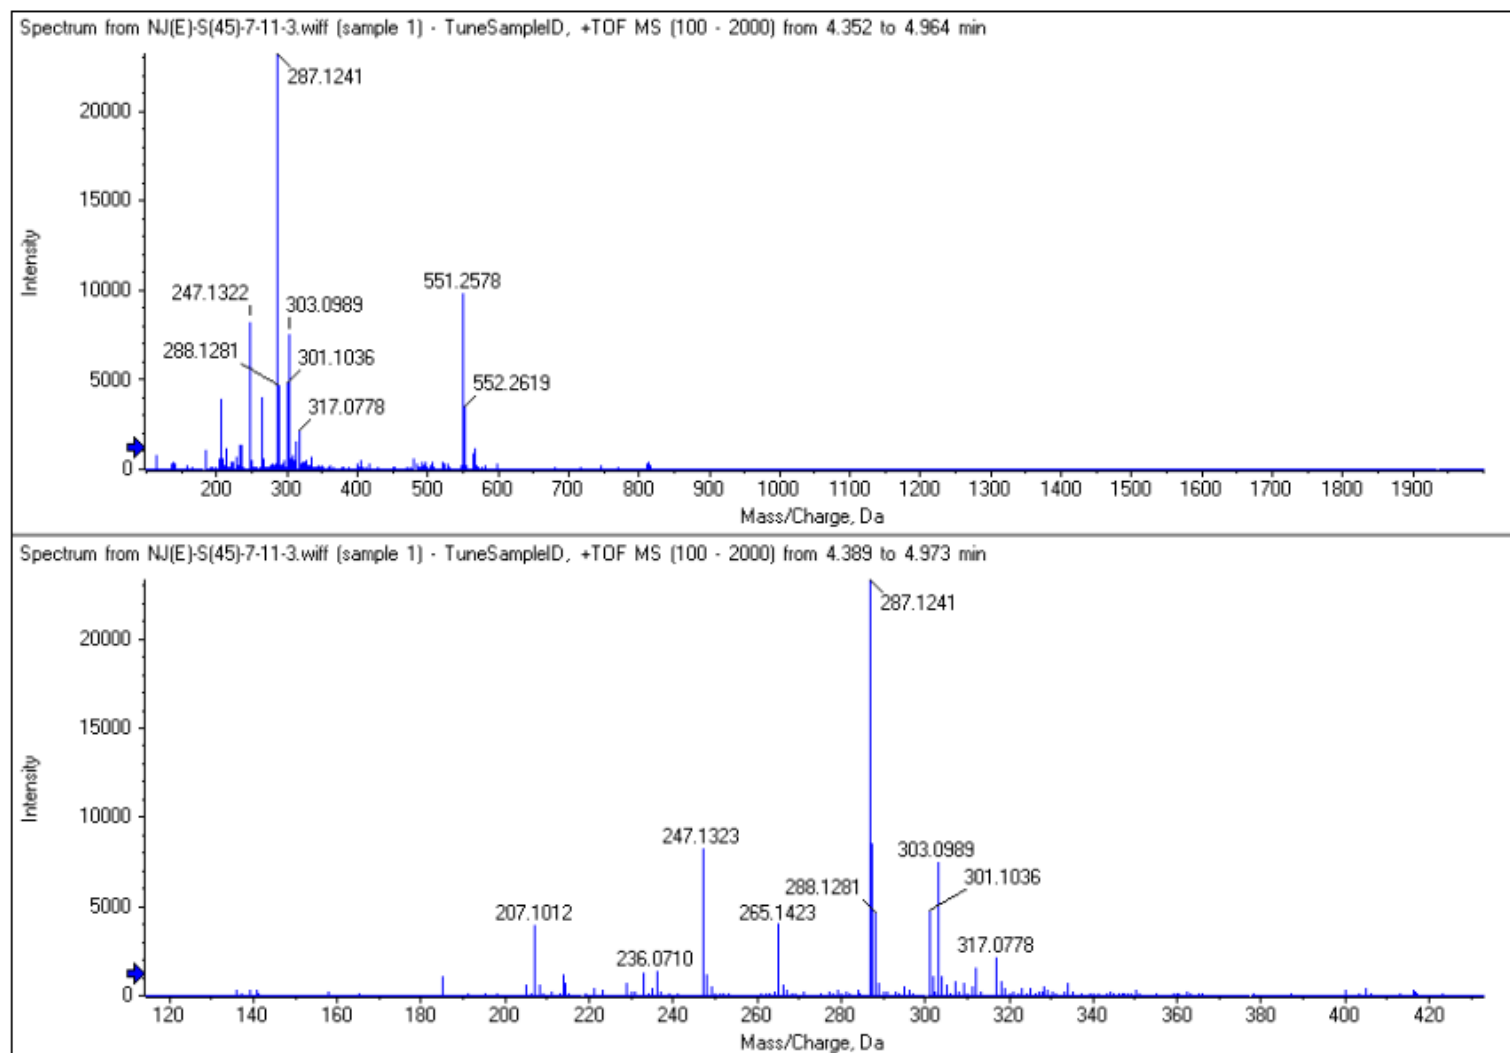

**Figure S1.** HRESIMS spectrum of compound 1.

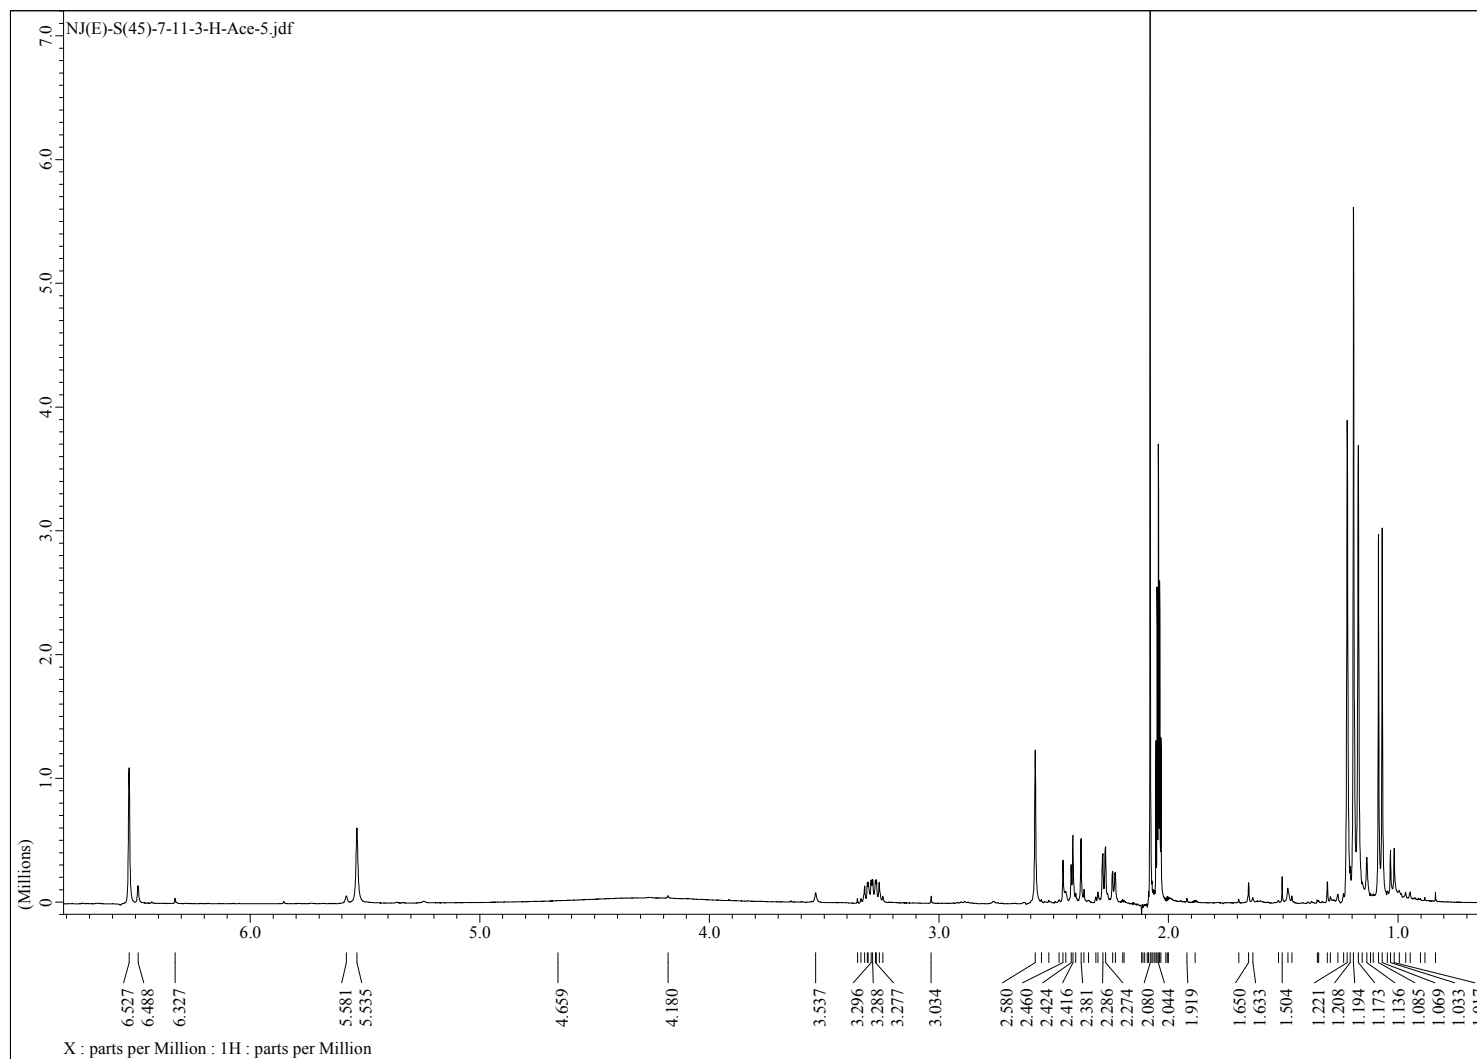

**Figure S2.**  $^1\text{H}$  NMR (400 MHz, acetone- $d_6$ ) spectrum of compound **1**.

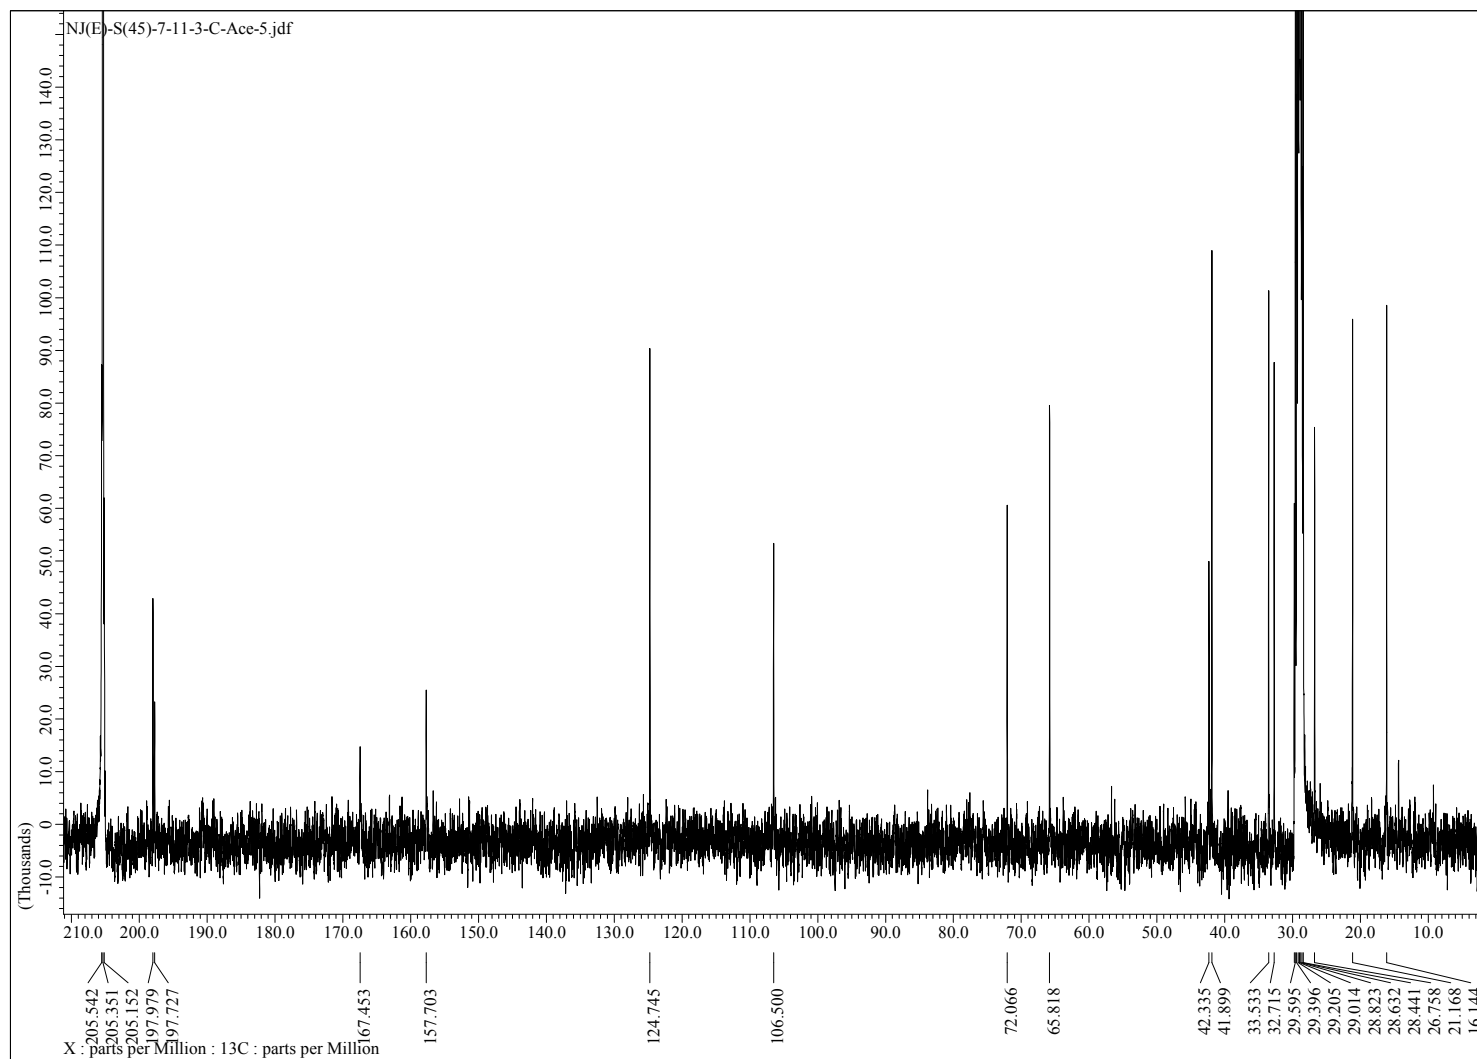

**Figure S3.**  $^{13}\text{C}$  NMR (100 MHz, acetone- $d_6$ ) spectrum of compound **1**.

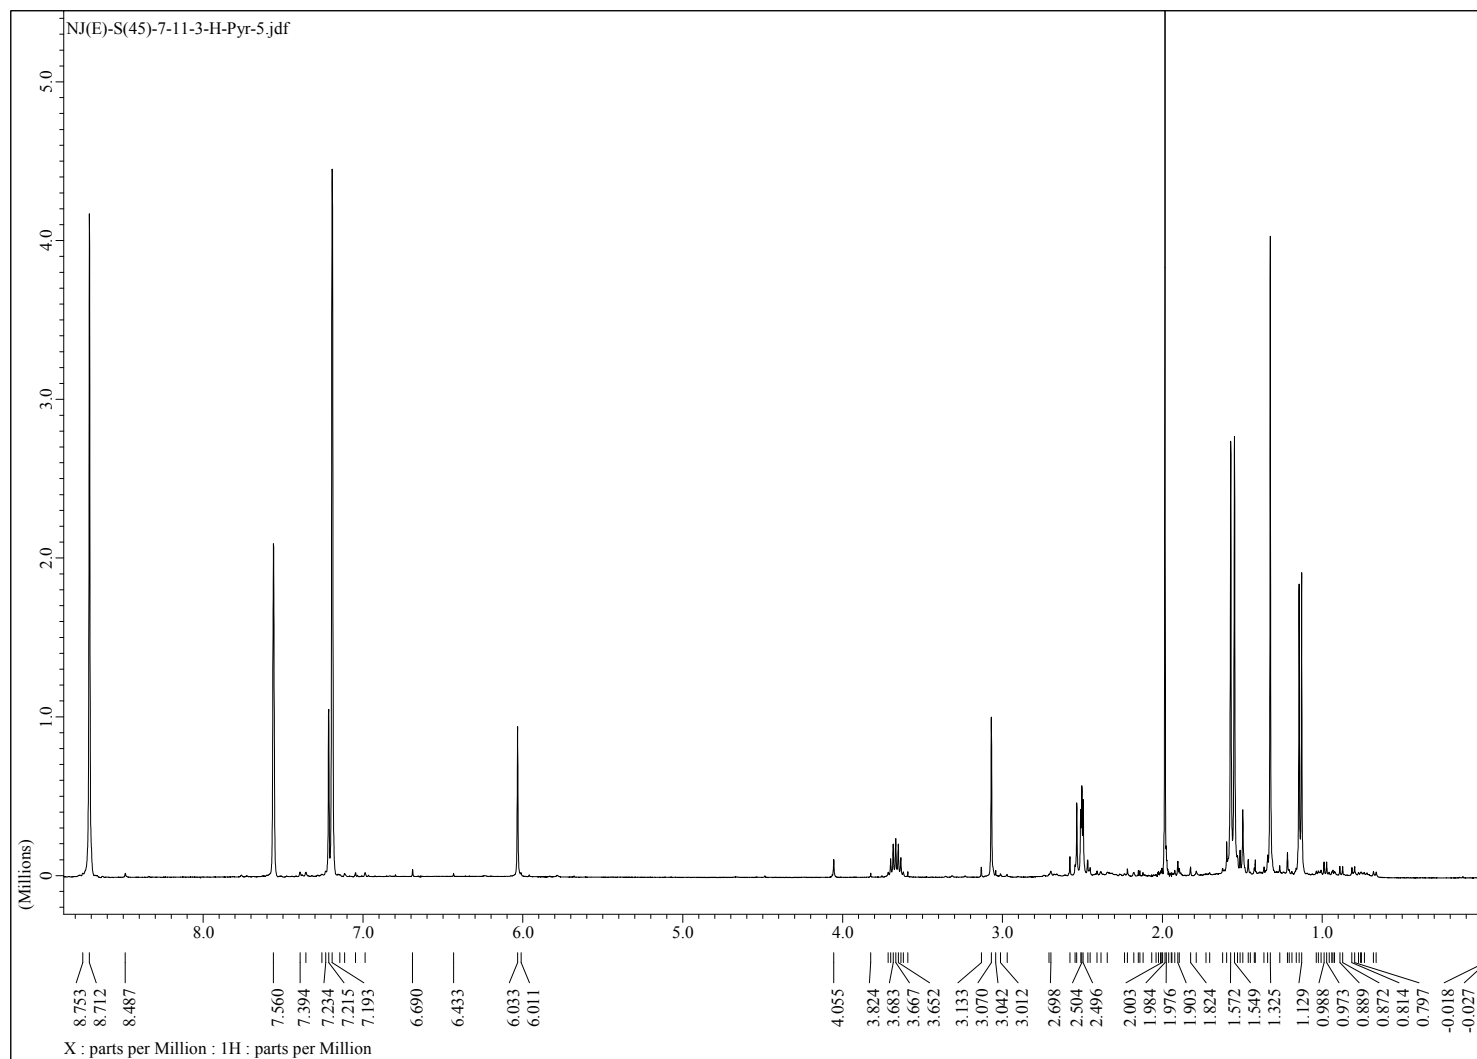

**Figure S4.**  $^1\text{H}$  NMR (400 MHz, pyridine- $d_5$ ) spectrum of compound **1**.

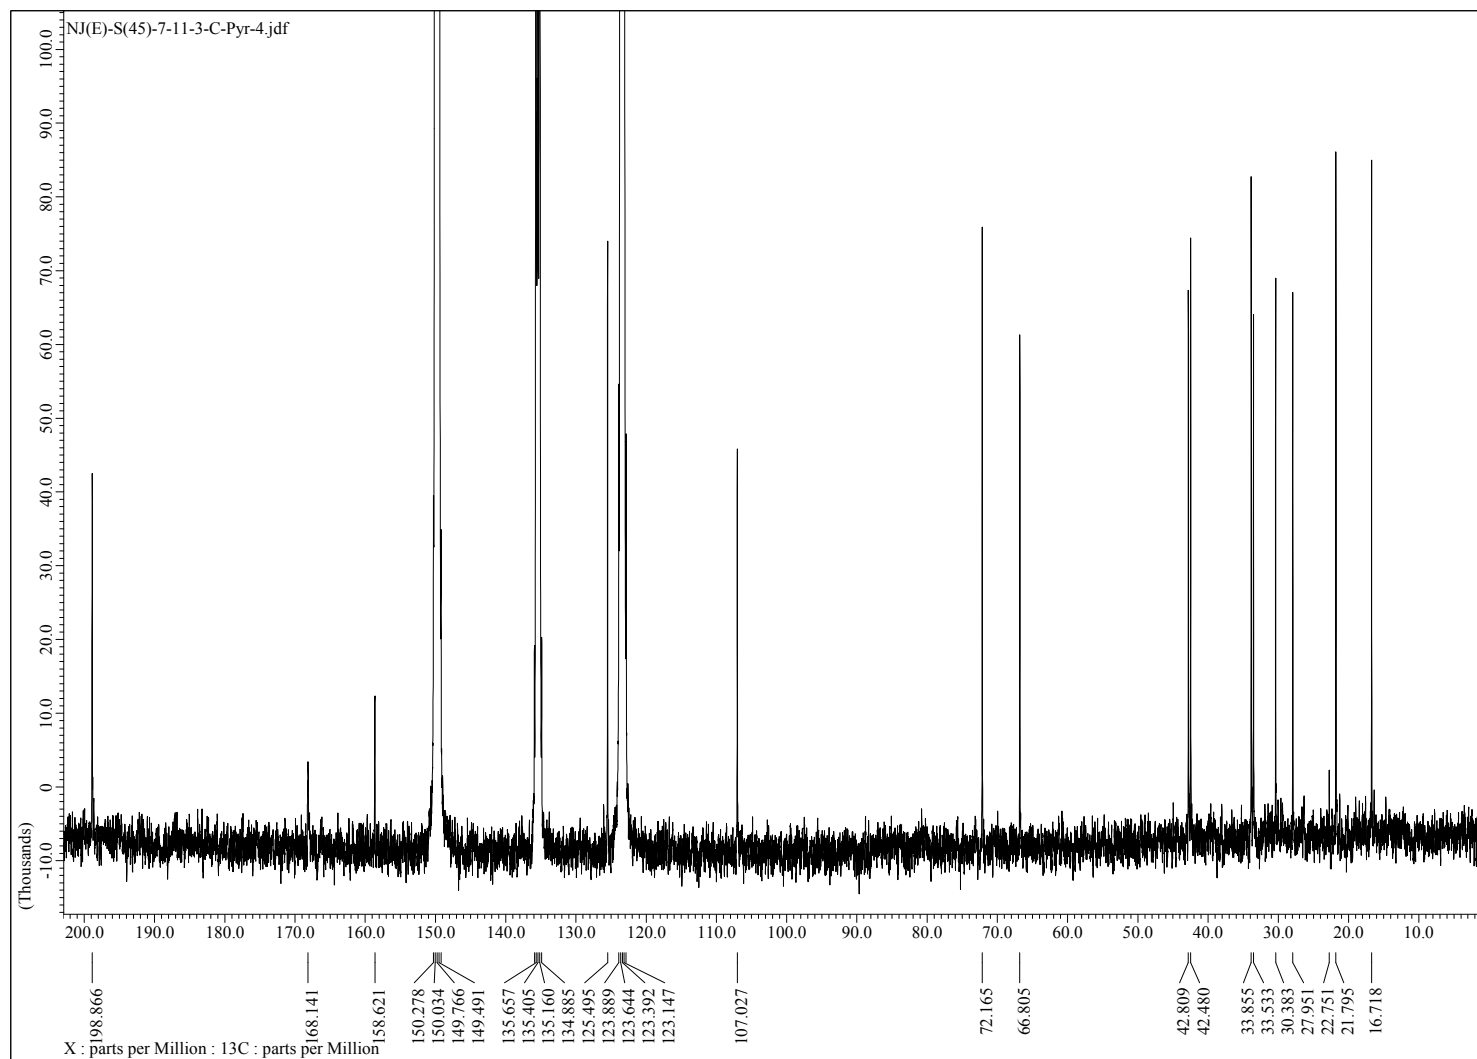

**Figure S5.**  $^{13}\text{C}$  NMR (100 MHz, pyridine- $d_5$ ) spectrum of compound **1**.

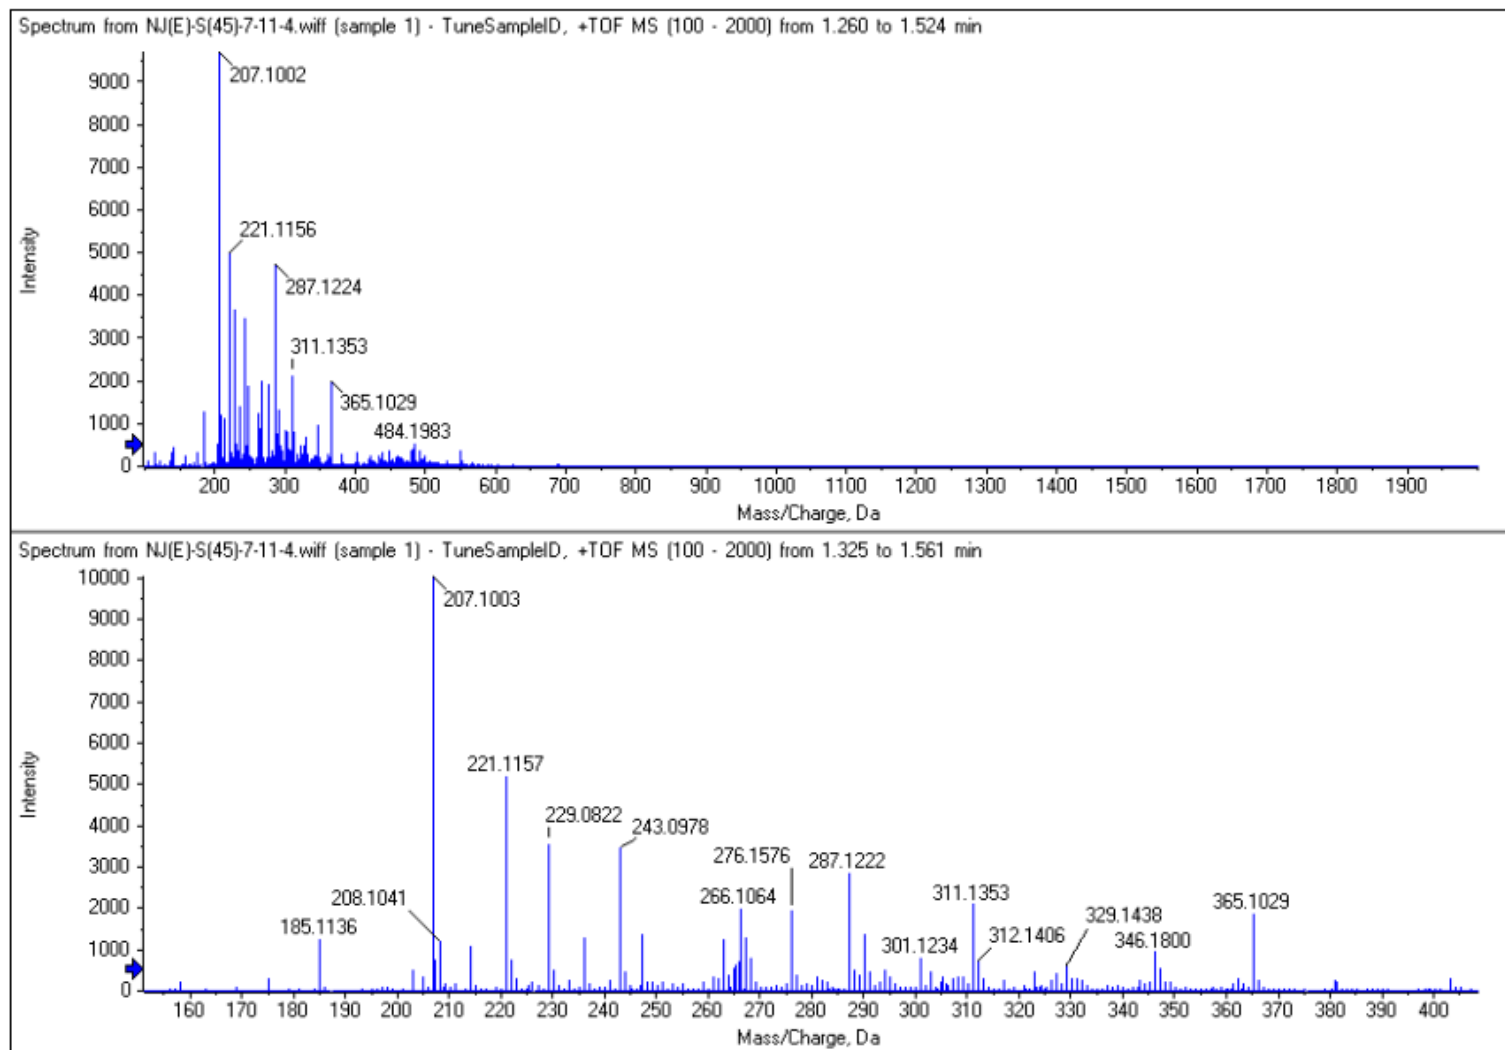

**Figure S6.** HRESIMS spectrum of compound **2**.



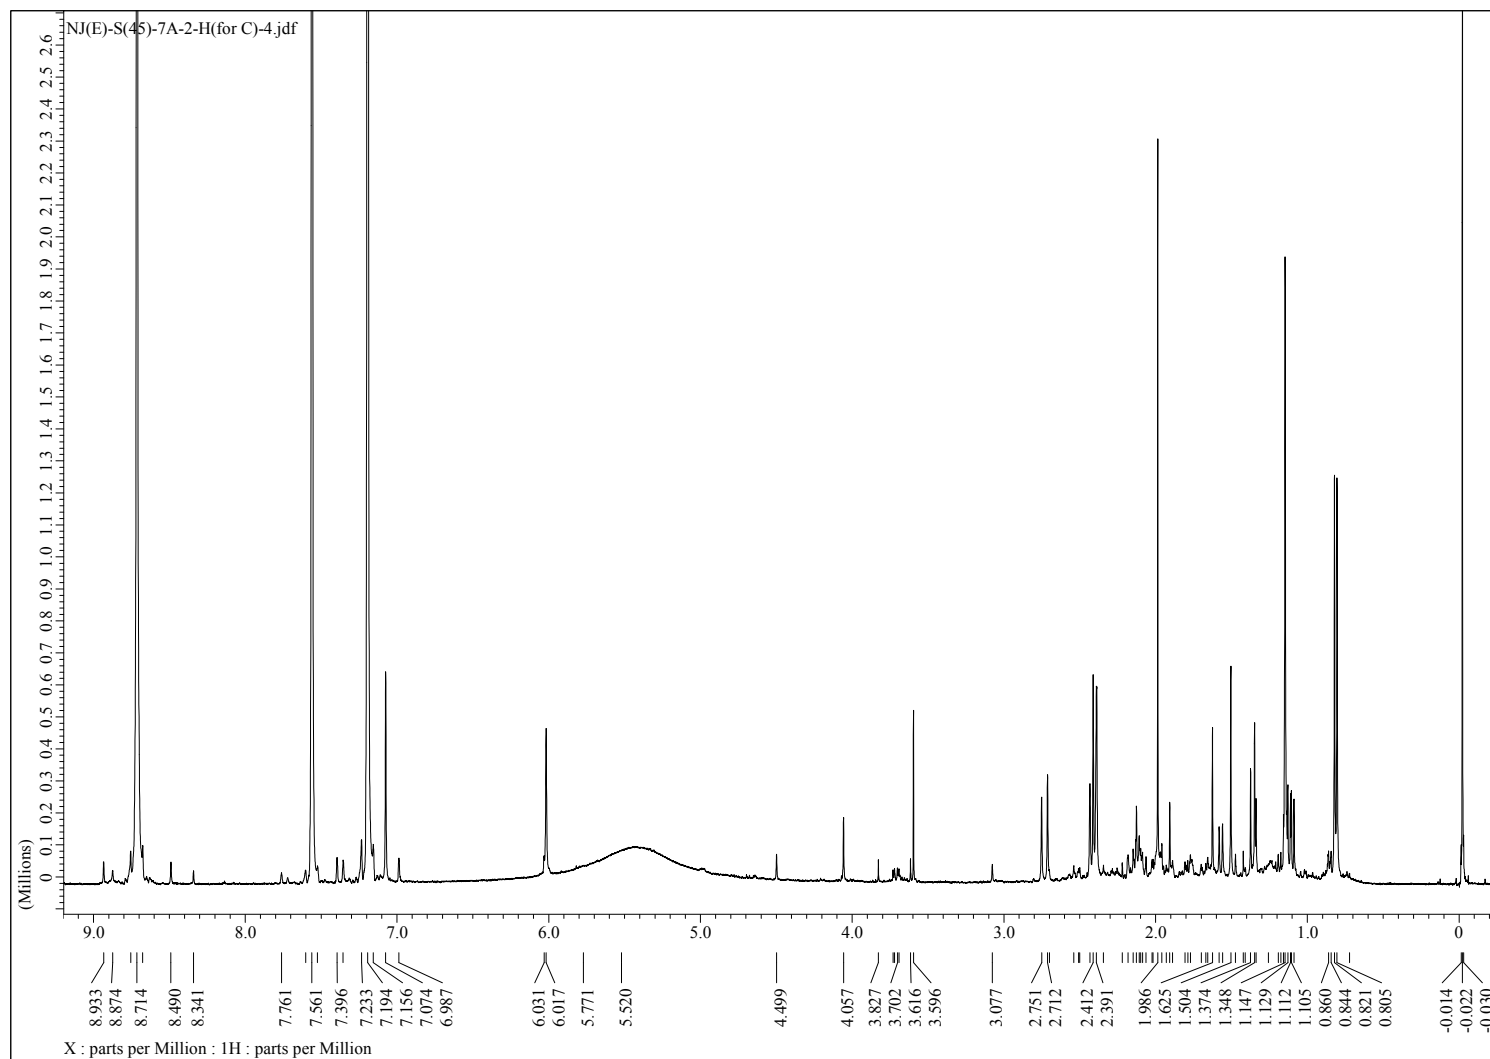

**Figure S7.**  $^1\text{H}$  NMR (400 MHz, pyridine- $d_5$ ) spectrum of compound **2**.

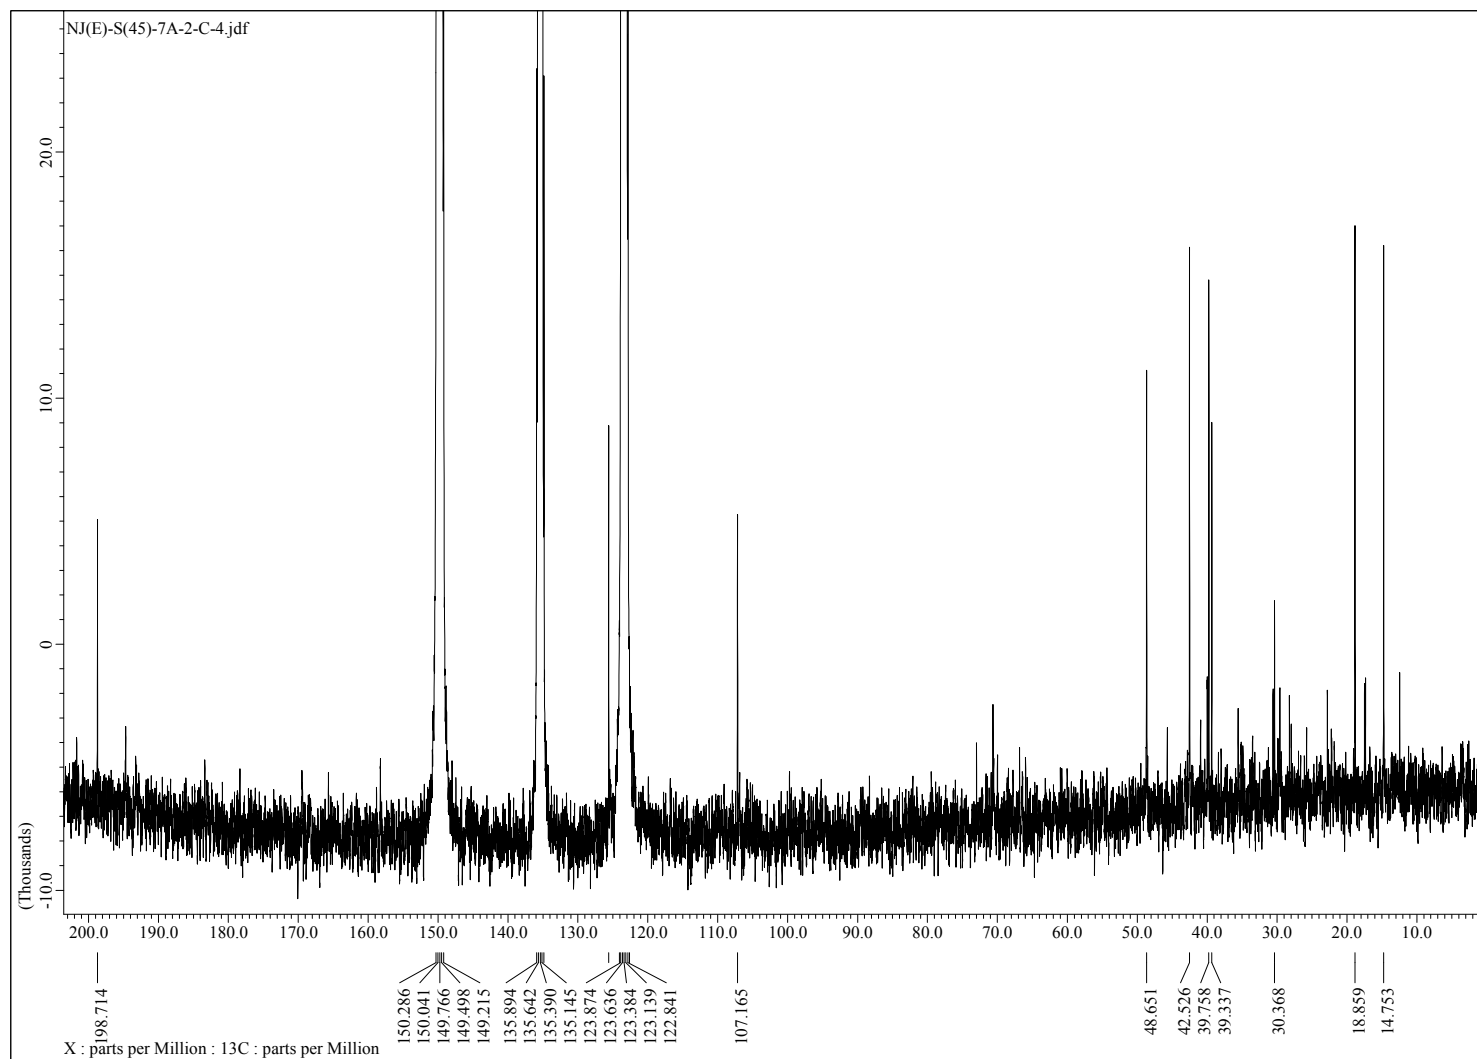

**Figure S8.**  $^{13}\text{C}$  NMR (100 MHz, pyridine- $d_5$ ) spectrum of compound **2**.

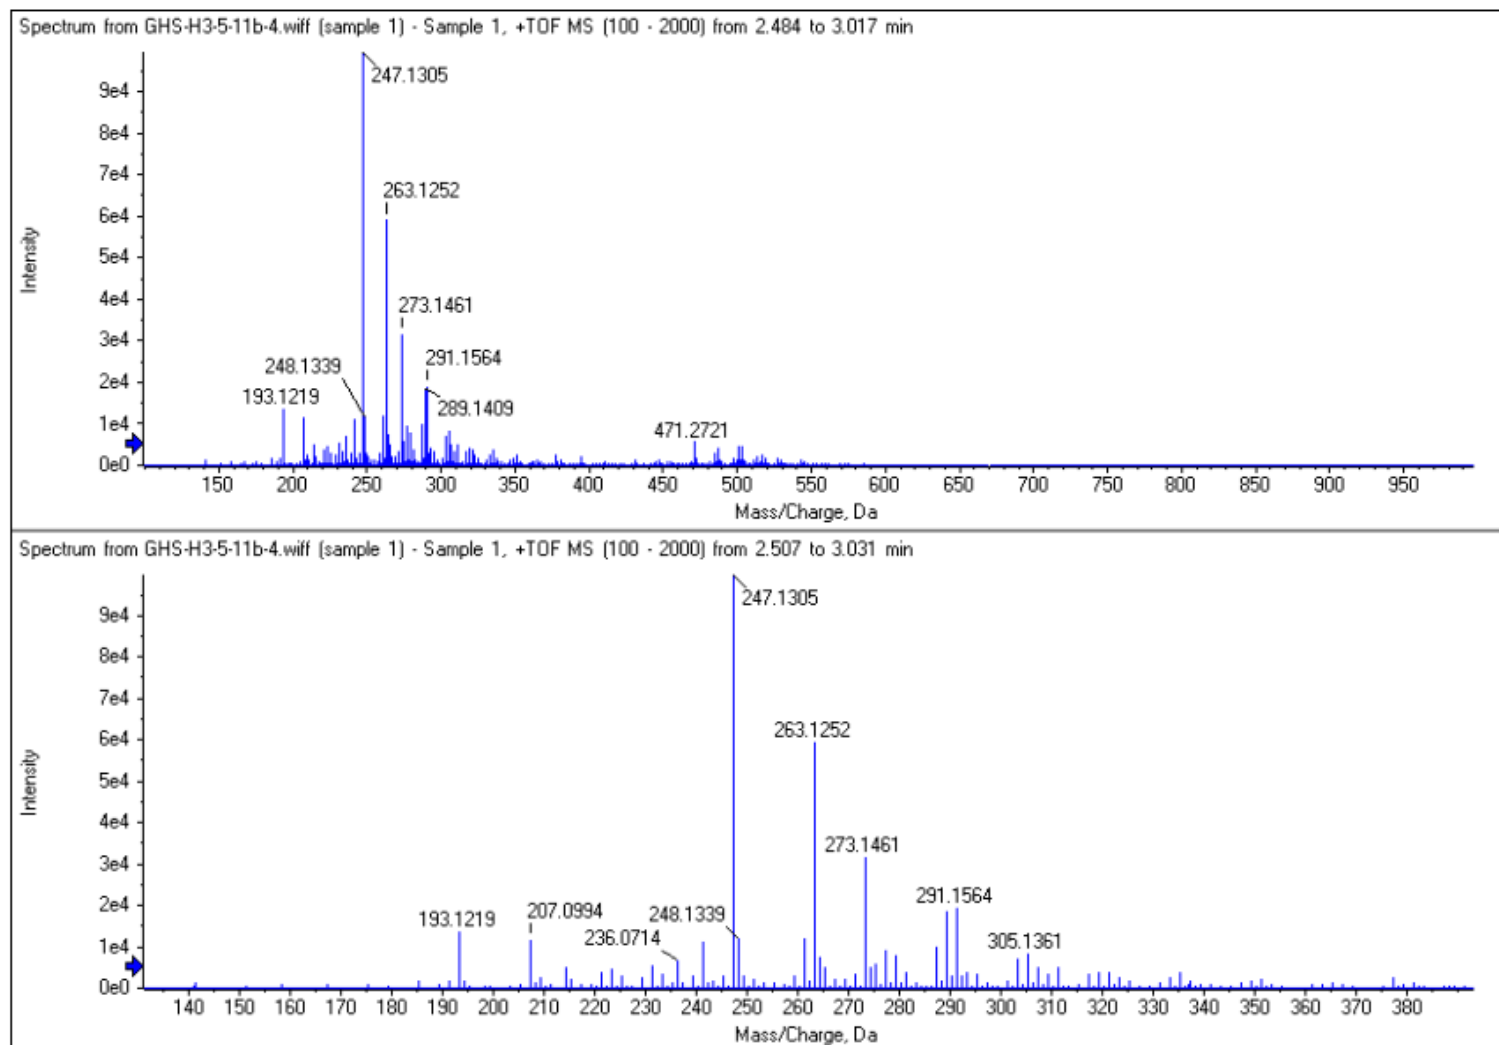

**Figure S9.** HRESIMS spectrum of compound **3**.

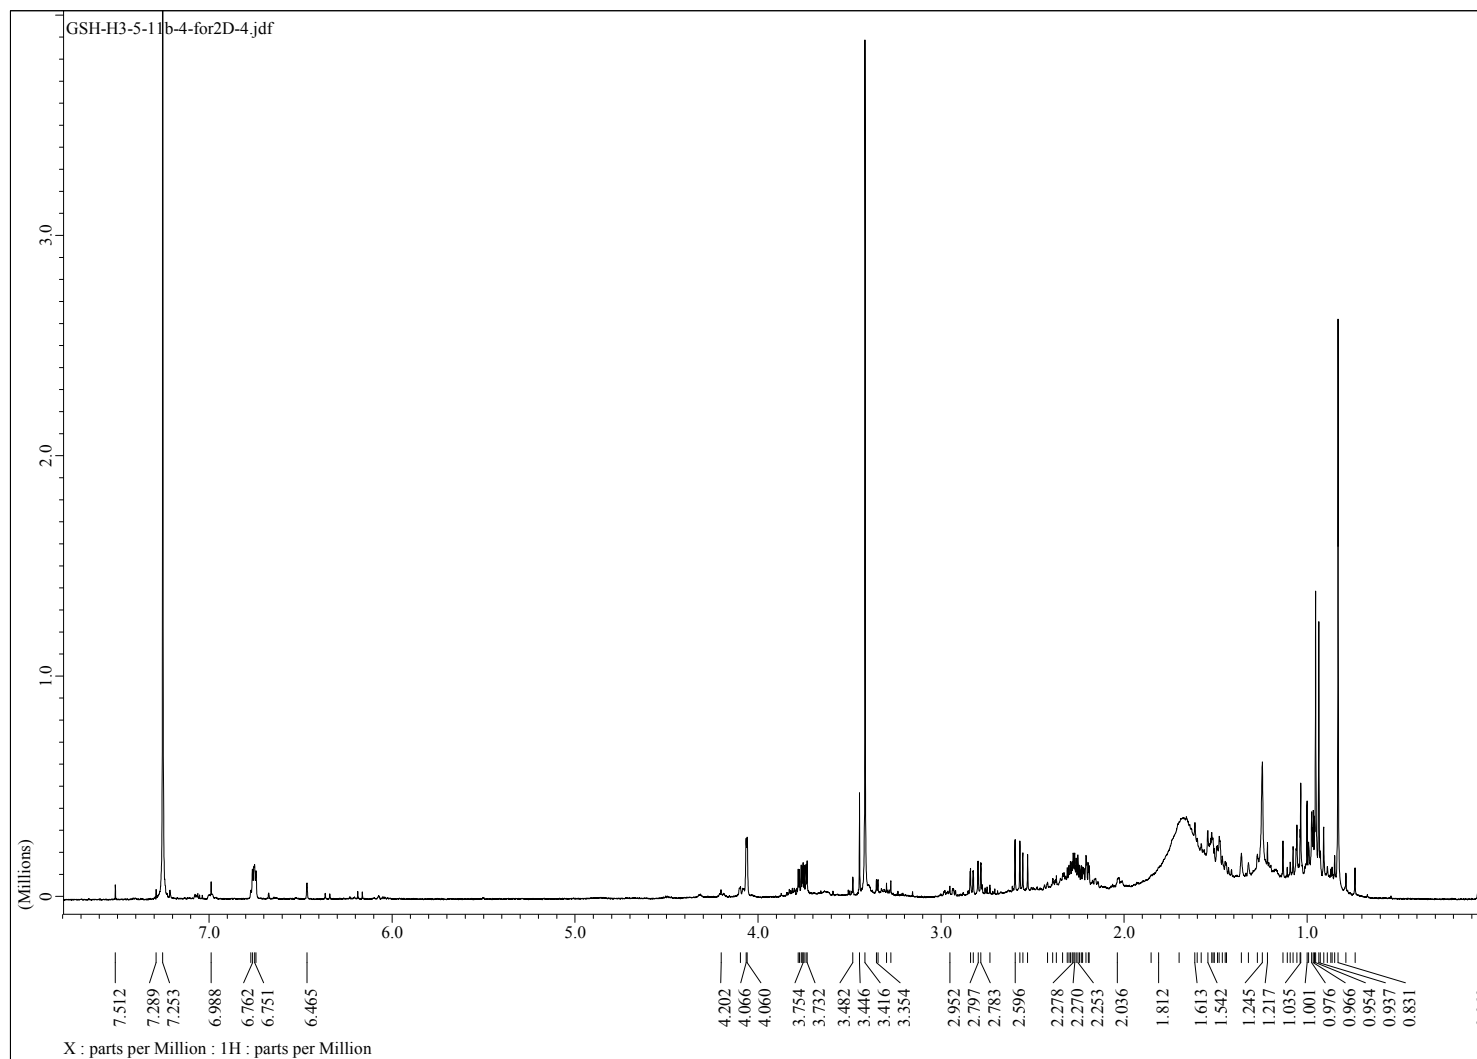

**Figure S10.**  $^1\text{H}$  NMR (400 MHz, chloroform-*d*) spectrum of compound **3**.

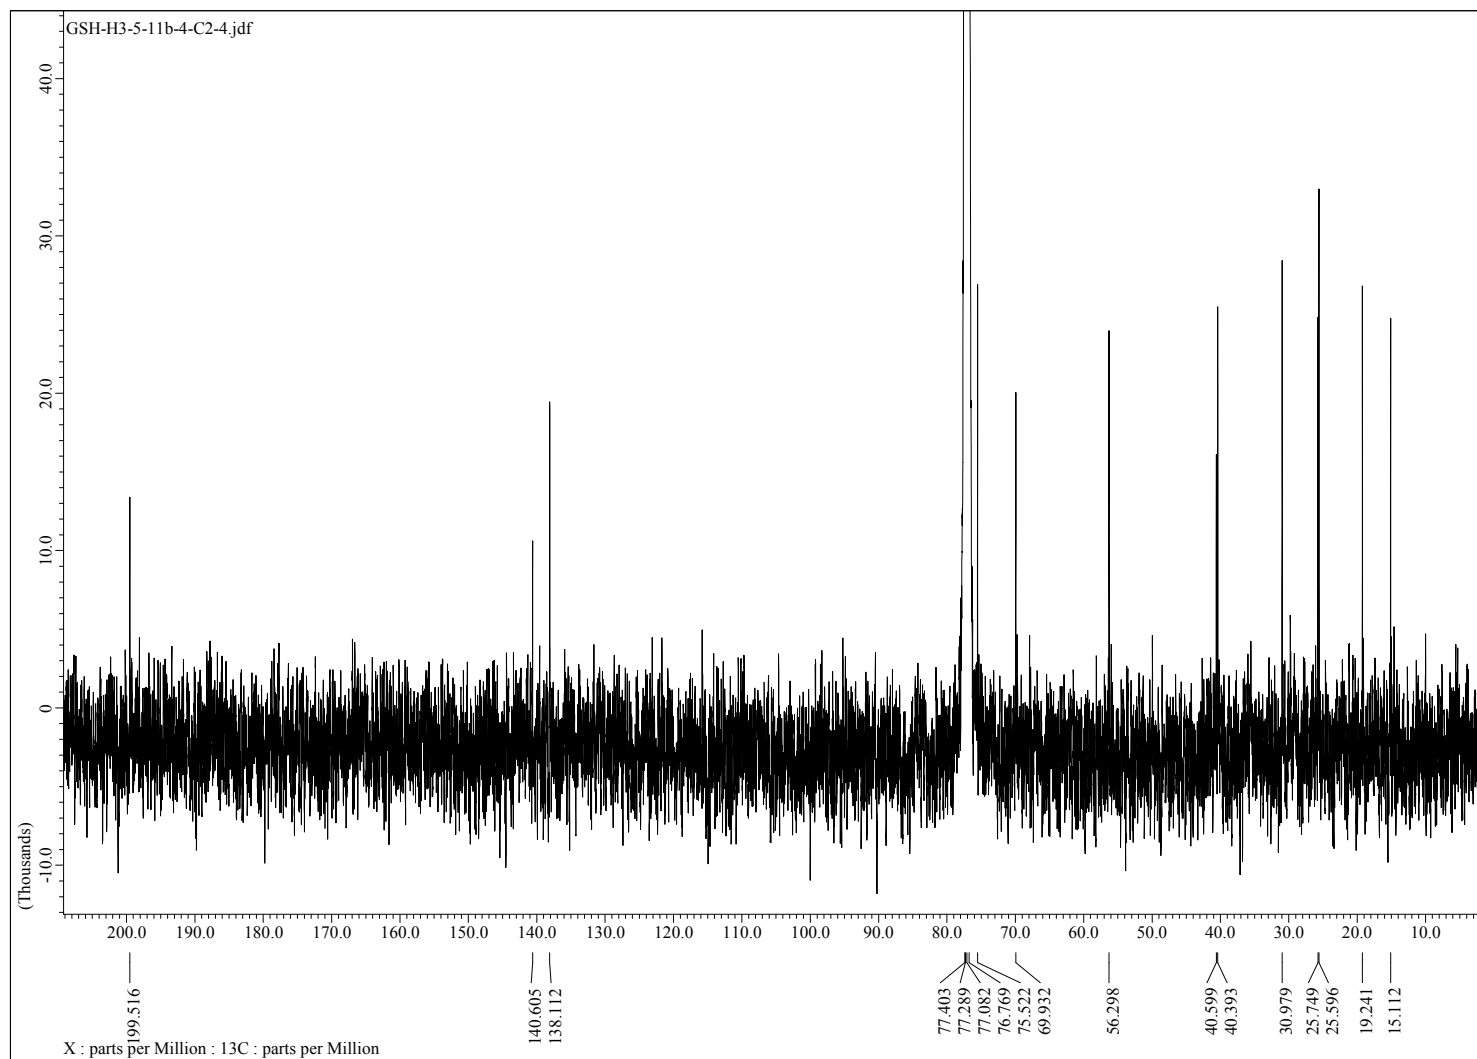

**Figure S11.**  $^{13}\text{C}$  NMR (100 MHz, chloroform-*d*) spectrum of compound **3**.

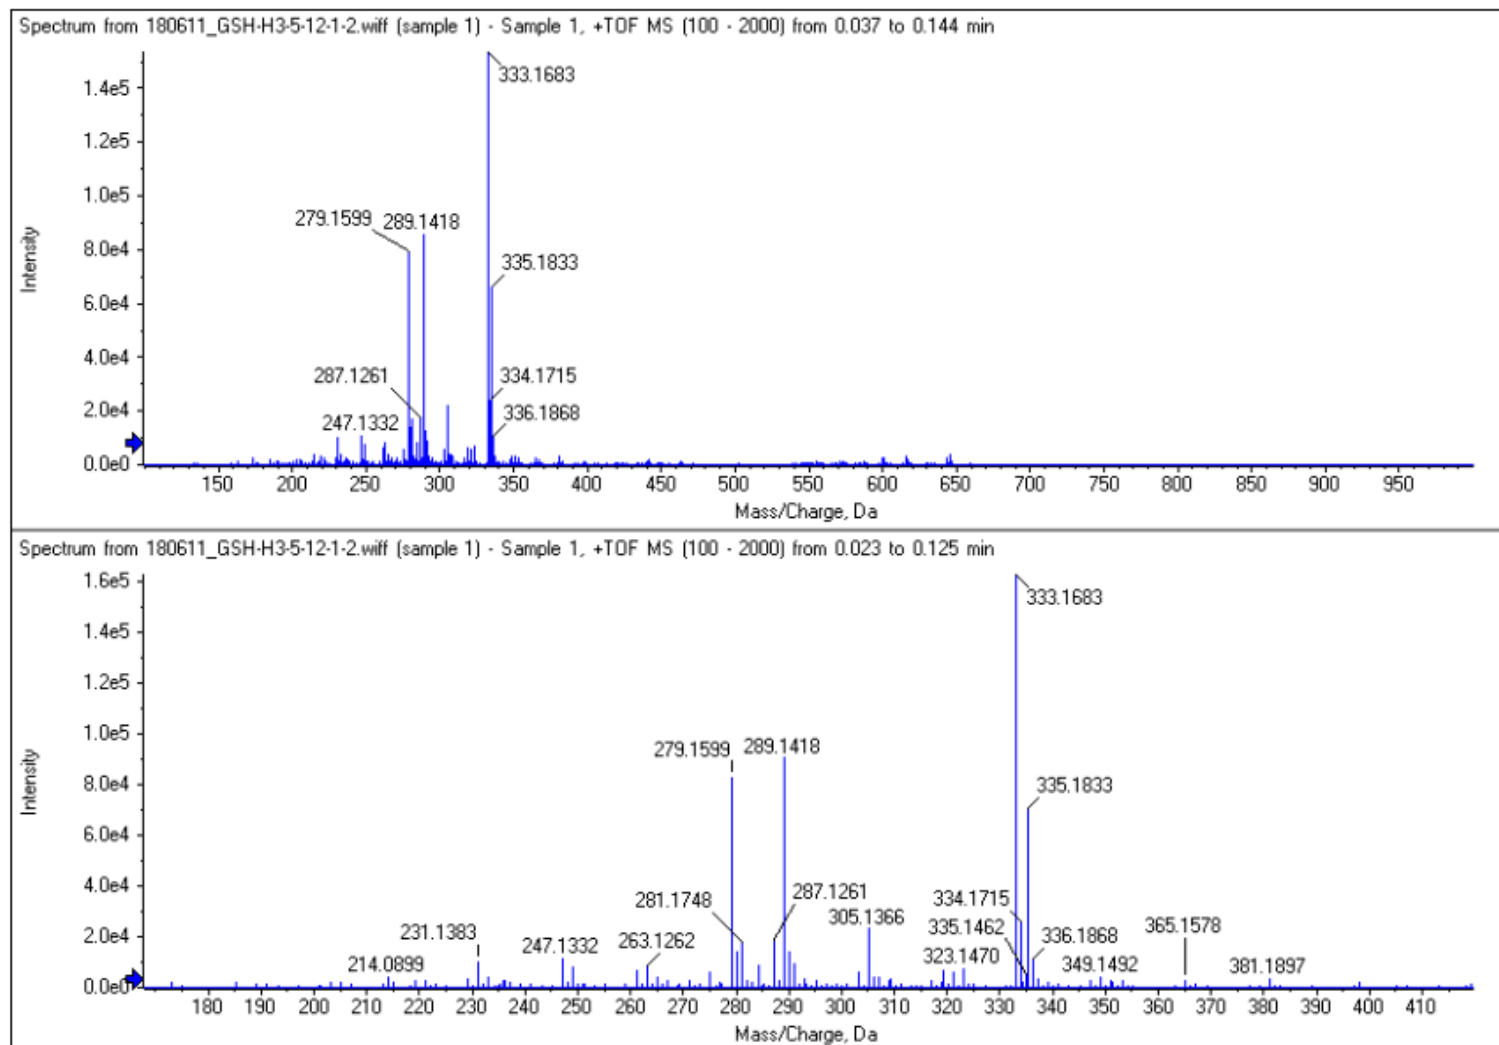

**Figure S12.** HRESIMS spectrum of compound 4.

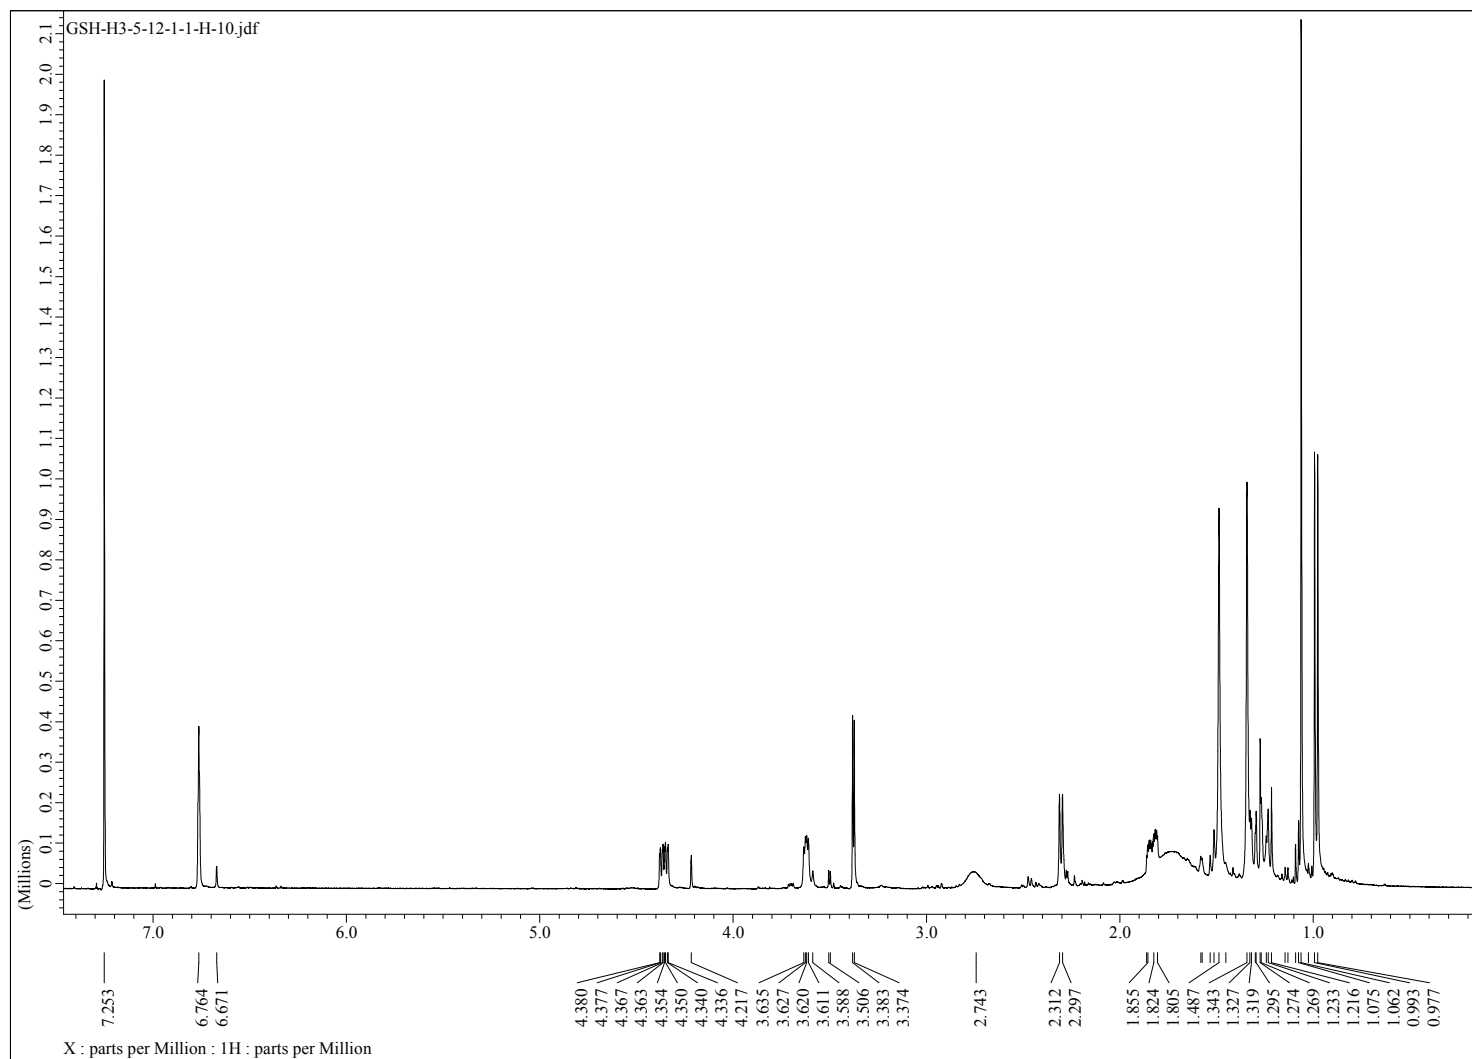

Figure S13.  $^1\text{H}$  NMR (400 MHz, chloroform-*d*) spectrum of compound 4.

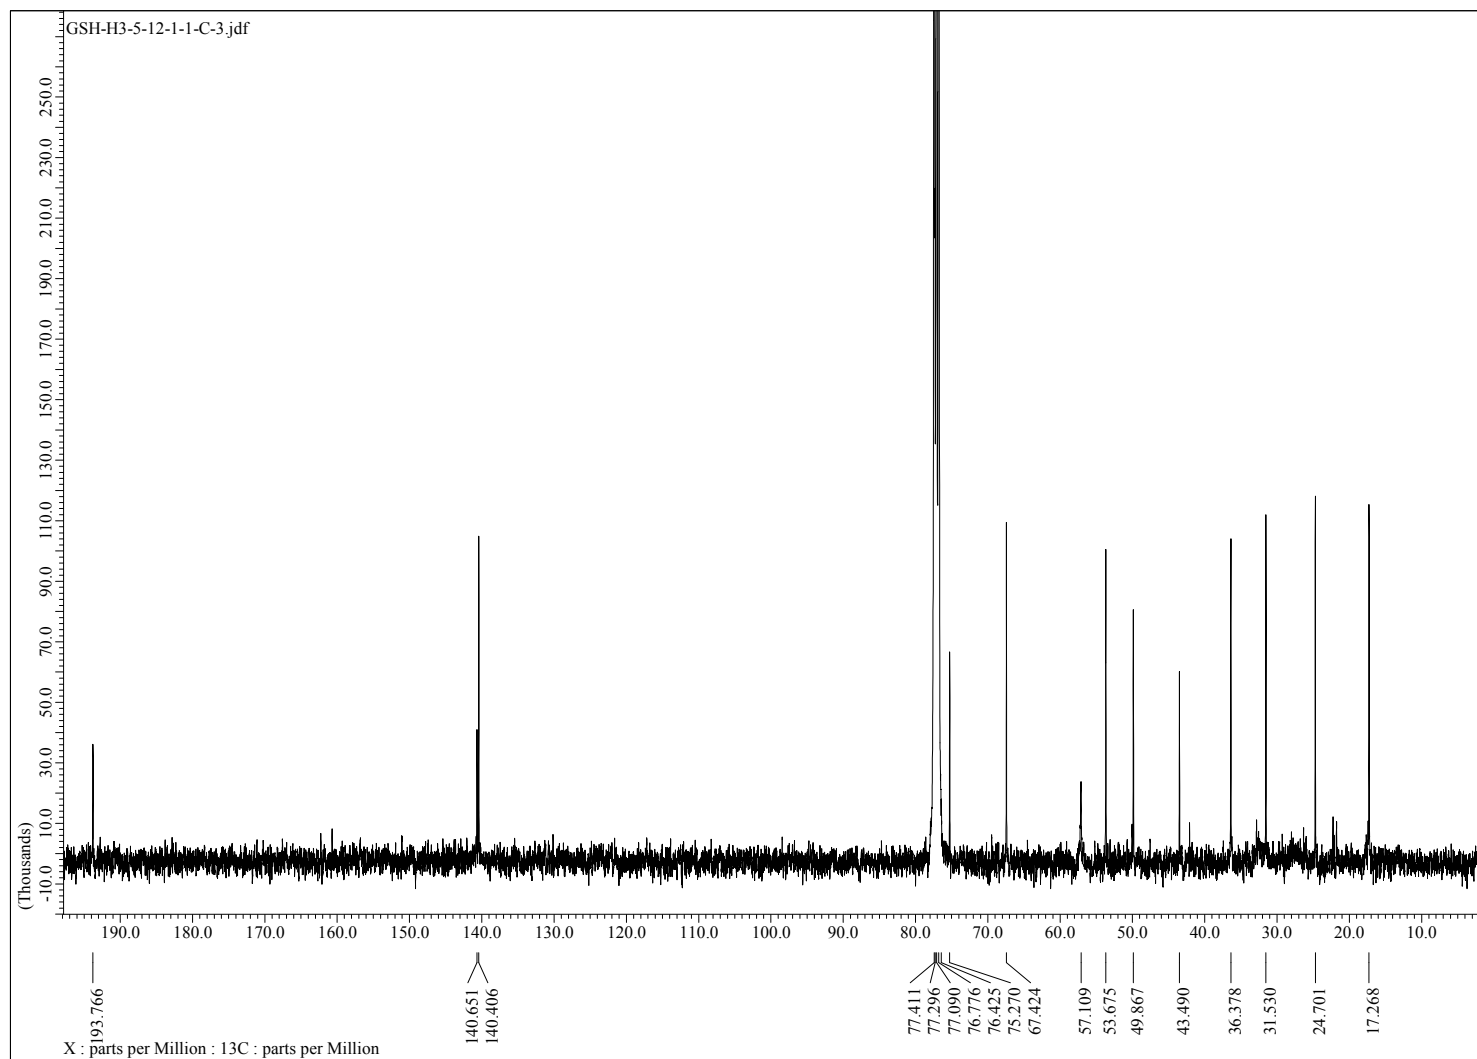

**Figure S14.**  $^{13}\text{C}$  NMR (100 MHz, chloroform-*d*) spectrum of compound **4**.



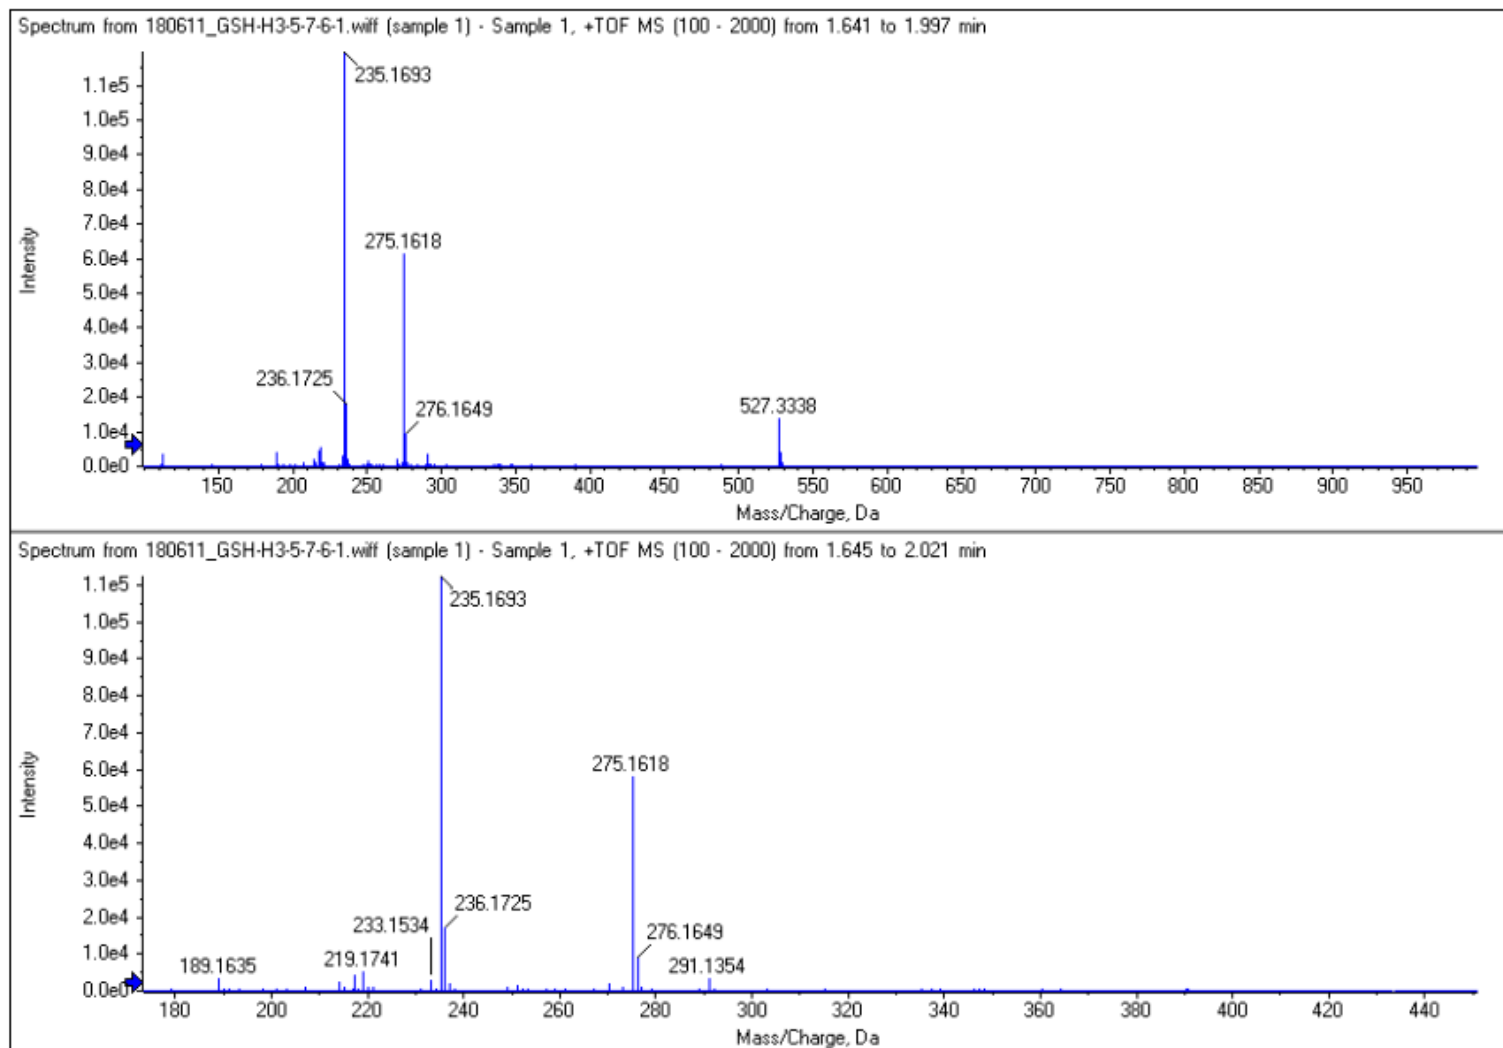

**Figure S15.** HRESIMS spectrum of compound **5**.

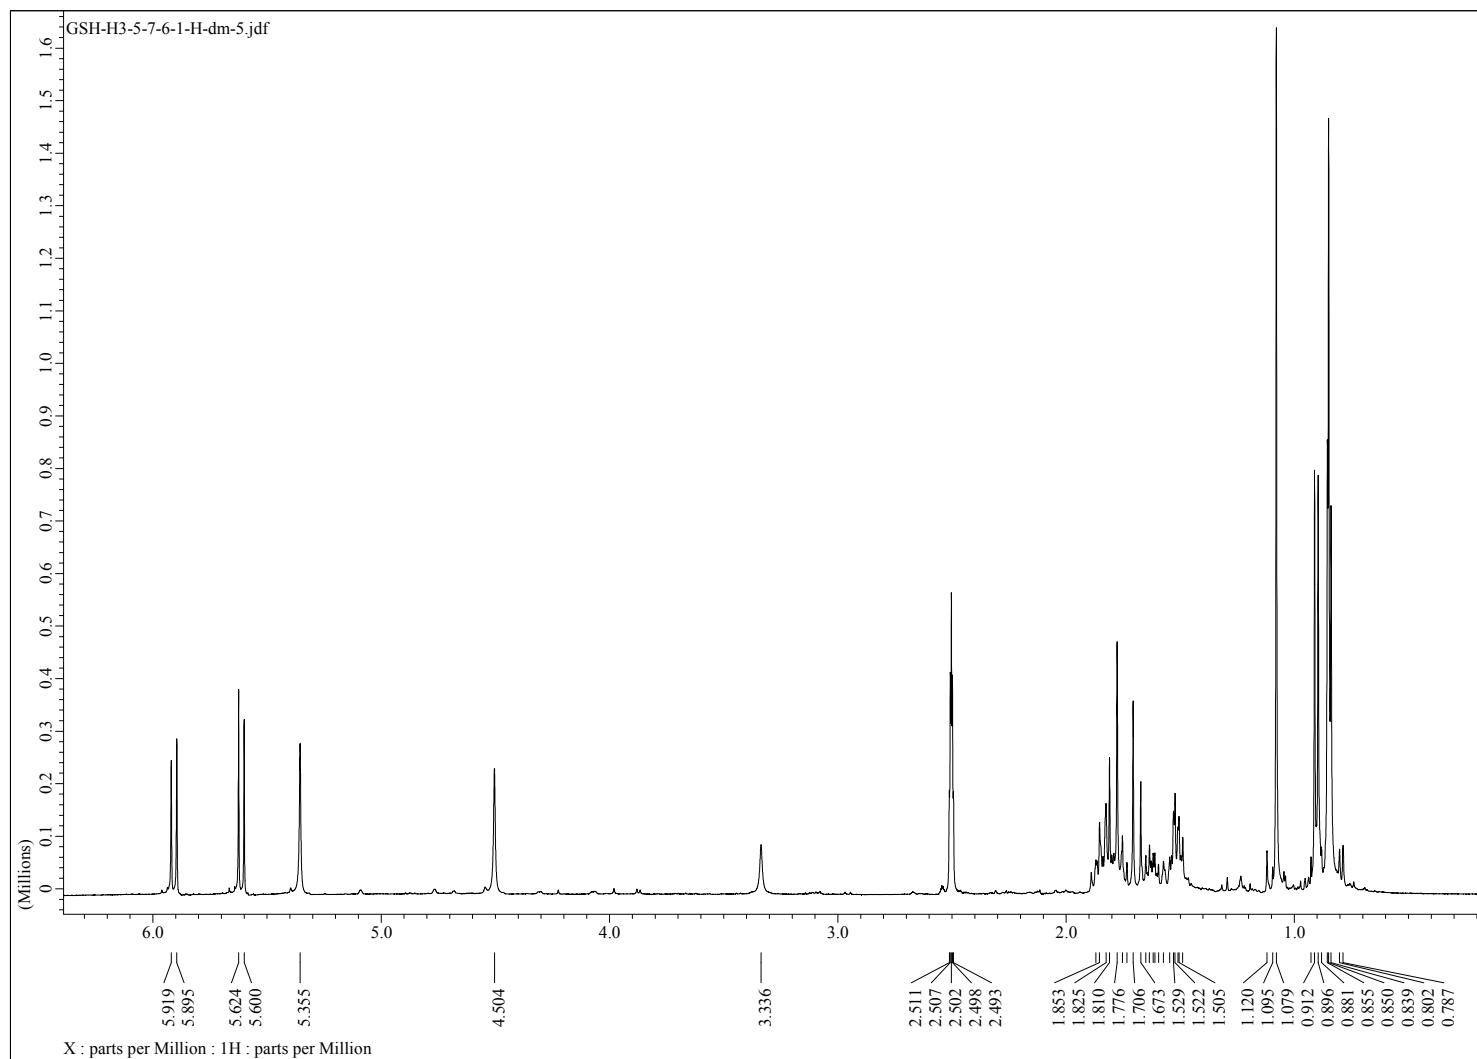

**Figure S16.**  $^1\text{H}$  NMR (400 MHz,  $\text{DMSO-}d_6$ ) spectrum of compound **5**.

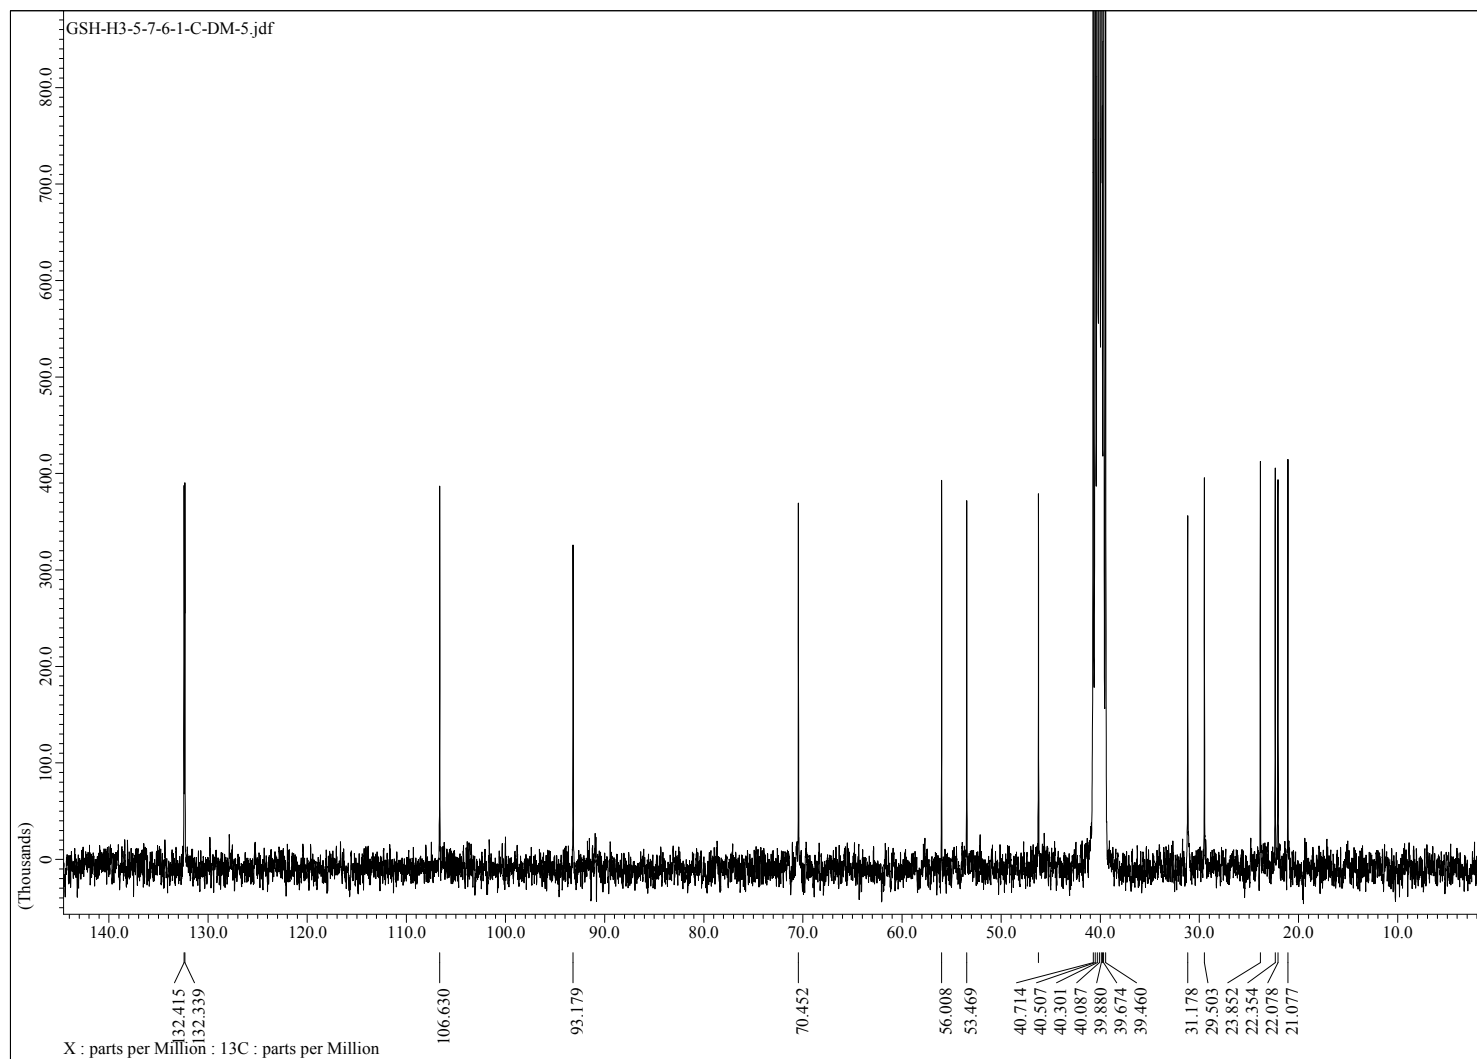

**Figure S17.**  $^{13}\text{C}$  NMR (100 MHz,  $\text{DMSO-}d_6$ ) spectrum of compound **5**.

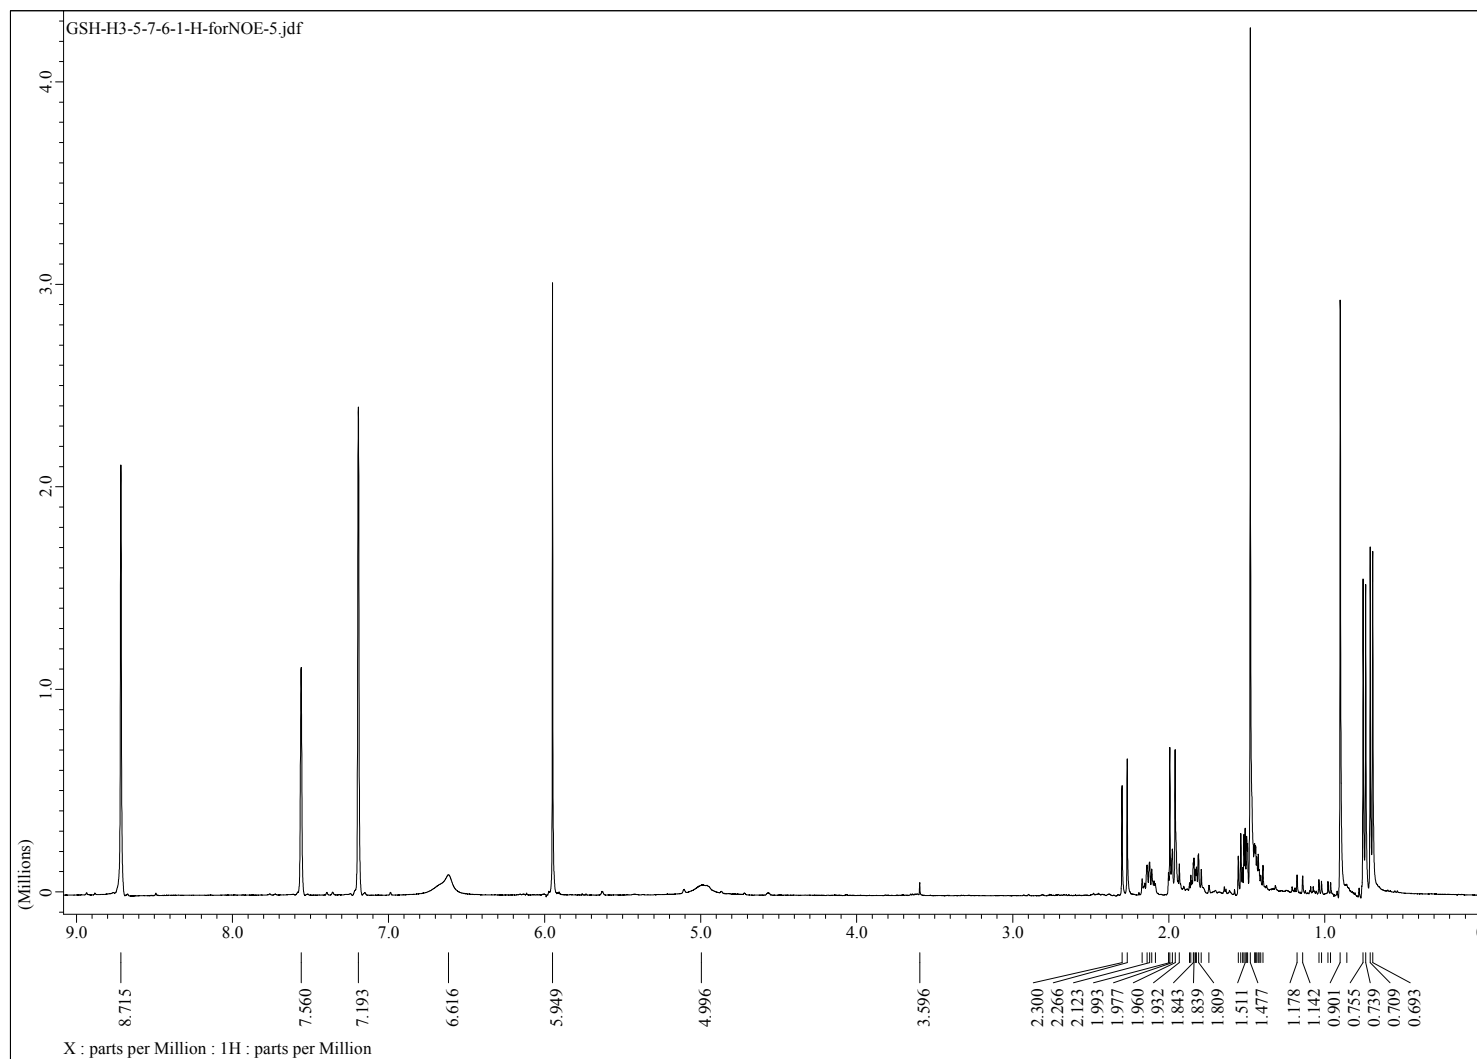

**Figure S18.**  $^1\text{H}$  NMR (400 MHz, pyridine- $d_5$ ) spectrum of compound **5**.

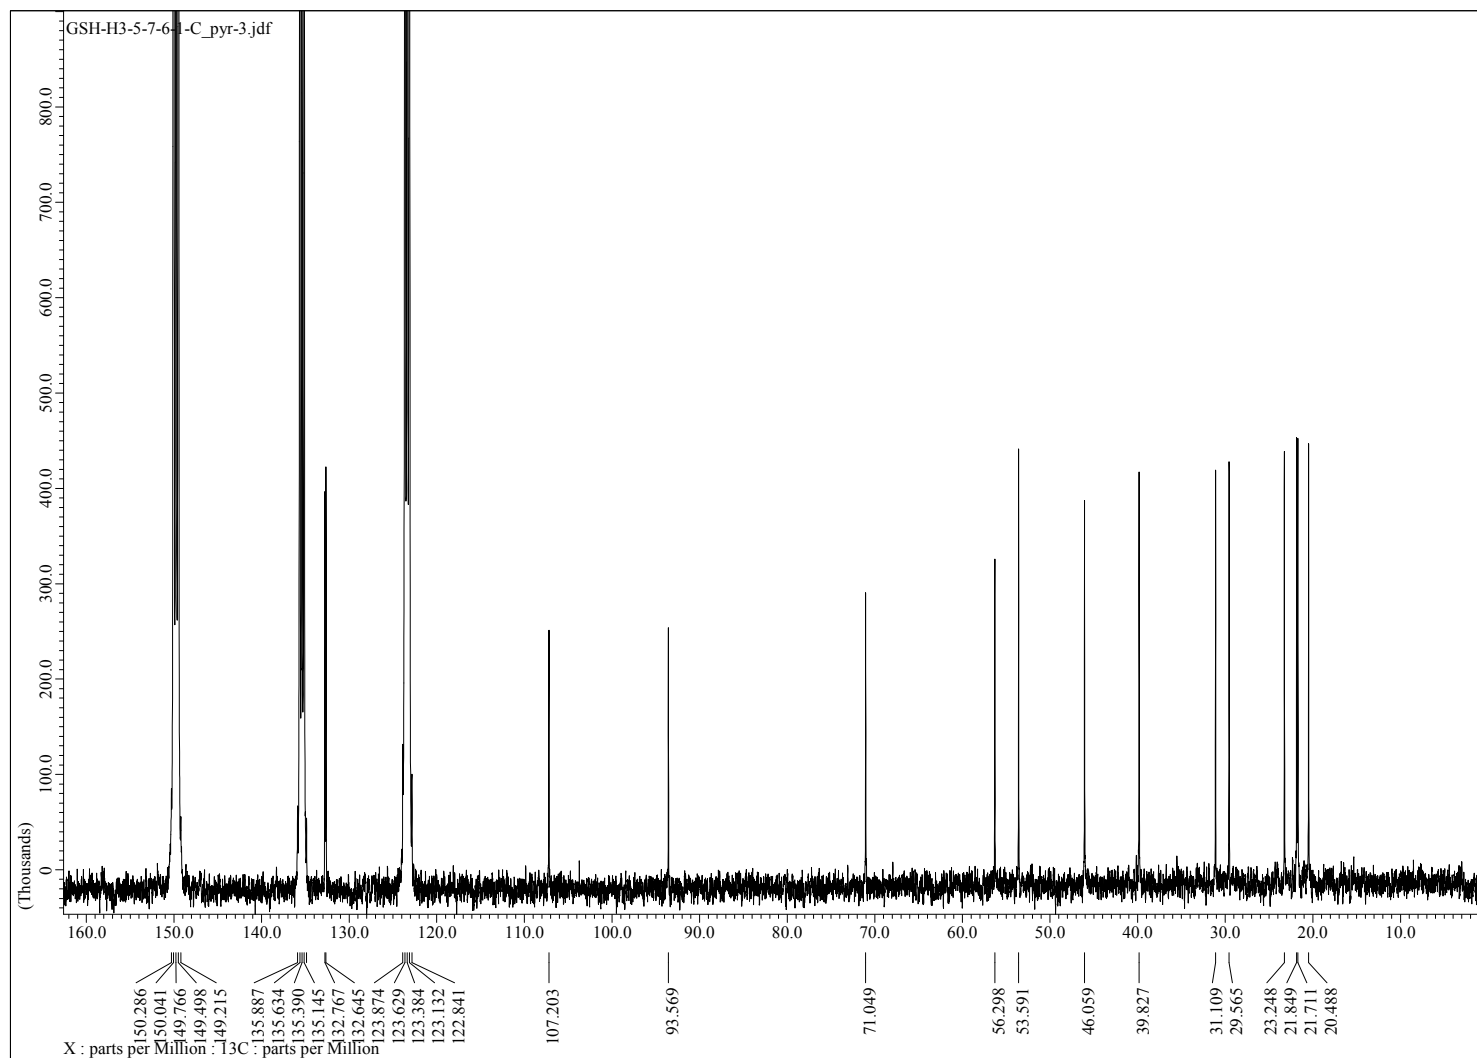

**Figure S19.**  $^{13}\text{C}$  NMR (100 MHz, pyridine- $d_5$ ) spectrum of compound **5**.
